# Supplementary material for: Risk for neonatal hypoglycaemia and bradycardia after beta-blocker use during pregnancy or lactation: a systematic review and meta-analysis protocol
Source: HighWire-hosted journal article supplement (doi:10.1136/bmjopen-2021-055292), 2022-08-01
Supplement: bmjopen-2021-055292supp002_data_supplement.pdf [file bmjopen-2021-055292supp002_data_supplement.pdf]

## Supplemental file 2

### Search strategy

#### embase.com

('beta adrenergic receptor blocking agent'/exp OR (((beta\* OR  $\beta$  OR  $\beta$ 1 OR  $\beta$ 2 OR  $\beta$ 3) NEAR/3 (block\* OR antagonist\*)) OR adaprolol\* OR afurolool\* OR alprenolol\* OR befunolol\* OR bfe-55\* OR bopindolol\* OR bornaprolol\* OR bromoacetylalprenololmenthane\* OR bucindolol\* OR bucumolol\* OR bufetolol\* OR bufuralol\* OR bunitrolol\* OR bunolol\* OR bupranolol\* OR butofilolol\* OR carazolol\* OR carpindolol\* OR carteolol\* OR carvedilol\* OR cloranolol\* OR deacetylmetipranolol\* OR dexpropranolol\* OR diacetolol\* OR dichlorisoprenaline\* OR dihydroalprenolol\* OR dilevalol\* OR diprafenone\* OR ersentilide\* OR exaprolol\* OR falintolol\* OR flestolol\* OR hydroxybenzylpindolol\* OR indenolol\* OR iodopindolol\* OR iprocrolol\* OR isamoltane\* OR isoxaprolol\* OR labetalol\* OR levobunolol\* OR levomoprolol\* OR mepindolol\* OR mercuderamide\* OR metipranolol\* OR moprolol\* OR nadolol\* OR nifenalol\* OR oberadilol\* OR oxprenolol\* OR pafenolol\* OR pamatolol\* OR penbutolol\* OR pindolol\* OR primidolol\* OR prizidilol\* OR procinolol\* OR pronetalol\* OR propranolol\* OR proxodolol\* OR ridazolol\* OR soquinolol\* OR sotalol\* OR spirendolol\* OR tazolol\* OR tertatolol\* OR tienoxolol\* OR tilisolol\* OR timolol\* OR tolamolol\* OR toliprolol\* OR trasitensin\* OR trepress\* OR tribendilol\* OR viskaldix\* OR xibenolol\* OR zoleprodolol\* OR acebutolol\* OR alpha-hydroxymetoprolol\* OR atenolol\* OR bendacalol\* OR betaxolol\* OR bevantolol\* OR bisoprolol\* OR celiprolol\* OR cetamolol\* OR cyanoiodopindolol\* OR cyanopindolol\* OR dramedilol\* OR epanolol\* OR esmolol\* OR flusoxolol\* OR landiolol\* OR metoprolol\* OR nebivolol\* OR practolol\* OR ritodrine\* OR salcardolol\* OR sandoz-204545\* OR talinolol\* OR vortioxetine\* OR bendacalol\* OR butoxamine\* OR cicloprolol\* OR arotinolol\*):Ab,ti) AND (pregnancy/exp OR 'pregnant woman'/de OR 'prenatal exposure'/de OR 'breast feeding'/exp OR 'breast milk'/de OR lactation/de OR 'maternal exposure'/de OR 'maternal treatment'/de OR 'prenatal drug exposure'/de OR 'prenatal period'/de OR 'maternal hypertension'/de OR 'intrauterine growth retardation'/de OR 'pregnancy disorder'/de OR 'pregnancy outcome'/exp OR 'drug milk level'/de OR 'placental transfer'/de OR 'perinatal drug exposure'/de OR (pregnan\* OR prenatal\* OR (breast NEXT/1 (feed\* OR fed OR milk)) OR human-milk OR lactat\* OR intra-uterin\* OR intrauterin\* OR ((fetus\* OR foetus\* OR fetal\* OR foetal\*) NEAR/3 expos\*) OR mother OR maternal OR placenta\* OR perinatal\* OR peri-natal\*):Ab,ti) AND (bradycardia/exp OR 'adverse event'/de OR 'side effect'/de OR 'intrauterine growth retardation'/de OR 'low birth weight'/exp OR hypoglycemia/de OR 'pregnancy outcome'/de OR stillbirth/exp OR 'Apgar score'/de OR hemodynamics/de OR 'toxicity and intoxication'/exp OR complication/de OR 'birth weight'/de OR prematurity/exp OR (adverse\* OR bradycard\* OR effect\* OR ((intrauterin\* OR intra-uterin\*) NEAR/3 growth) OR birth-weight\* OR birthweight\* OR (small NEXT/2 (date OR gestation\*)) OR hypoglycemi\* OR hypoglycaemia OR ((pregnan\* OR deliver\* OR obstetr\* OR childbirth OR labour OR labor) NEAR/3 outcome\*) OR stillbirth OR stillborn OR still-birth OR still-born OR Apgar OR harm\* OR toxic\* OR intoxic\* OR hemodynamic\* OR haemodynamic\* OR complication\* OR (prematu\* NEAR/3 (birth)) OR prematurity):ab,ti) AND (newborn/exp OR 'low birth weight'/exp OR stillbirth/exp OR 'Apgar score'/de OR 'birth weight'/de OR (newborn\* OR new-born\* OR neonat\* OR postnatal\* OR birth-weight\* OR birthweight\* OR (small NEXT/2 (date OR gestation\*)) OR stillbirth OR stillborn OR still-birth OR still-born OR Apgar):ab,ti) NOT ([animals]/lim NOT [humans]/lim) NOT ([conference abstract]/lim AND [2000-2018]/py) AND [english]/lim

**Medline ALL Ovid**

(exp Adrenergic beta-Antagonists/ OR (((beta\*) ADJ3 (block\* OR antagonist\*)) OR adaprolol\* OR afurolol\* OR alprenolol\* OR befunolol\* OR bfe-55\* OR bopindolol\* OR bornaprolol\* OR bromoacetylalprenololmenthane\* OR bucindolol\* OR bucumolol\* OR bufetolol\* OR bufuralol\* OR bunitrolol\* OR bunolol\* OR bupranolol\* OR butofilolol\* OR carazolol\* OR carpindolol\* OR carteolol\* OR carvedilol\* OR cloranolol\* OR deacetylmepipranolol\* OR dexpropranolol\* OR diacetolol\* OR dichlorisoprenaline\* OR dihydroalprenolol\* OR dilevalol\* OR diprafenone\* OR ersentilide\* OR exaprolol\* OR falintolol\* OR flestolol\* OR hydroxybenzylpindolol\* OR indenolol\* OR iodopindolol\* OR iprocrolol\* OR isamoltane\* OR isoxaprolol\* OR labetalol\* OR levobunolol\* OR levomoprolol\* OR mepindolol\* OR mercuderamide\* OR metipranolol\* OR moprolol\* OR nadolol\* OR nifenalol\* OR oberadilol\* OR oxprenolol\* OR pafenolol\* OR pamatolol\* OR penbutolol\* OR pindolol\* OR primidolol\* OR prizidilol\* OR procinolol\* OR pronetalol\* OR propranolol\* OR proxodolol\* OR ridazolol\* OR soquinolol\* OR sotalol\* OR spirendolol\* OR tazolol\* OR tertatolol\* OR tienoxolol\* OR tilisolol\* OR timolol\* OR tolamolol\* OR toliprolol\* OR trasitensin\* OR trepress\* OR tribendilol\* OR viskaldix\* OR xibenolol\* OR zoleprodolol\* OR acebutolol\* OR alpha-hydroxymetoprolol\* OR atenolol\* OR bendacalol\* OR betaxolol\* OR bevantolol\* OR bisoprolol\* OR celiprolol\* OR cetamolol\* OR cyanoiodopindolol\* OR cyanopindolol\* OR dramedilol\* OR epanolol\* OR esmolol\* OR flusoxolol\* OR landiolol\* OR metoprolol\* OR nebivolol\* OR practolol\* OR ritodrine\* OR salcardolol\* OR sandoz-204545\* OR talinolol\* OR vortioxetine\* OR bendacalol\* OR butoxamine\* OR cicloprolol\* OR arotinolol\*).ab,ti.) AND (exp Pregnancy/ OR Pregnant Women/ OR Breast Feeding/ OR Milk, Human/ OR Lactation/ OR Maternal Exposure/ OR Maternal-Fetal Exchange/ OR Prenatal Exposure Delayed Effects/ OR Fetal Growth Retardation/ OR exp Pregnancy Outcome/ OR (pregnan\* OR prenatal\* OR (breast ADJ (feed\* OR fed OR milk)) OR human-milk OR lactat\* OR intra-uterin\* OR intrauterin\* OR ((fetus\* OR foetus\* OR fetal\* OR foetal\*) ADJ3 expos\*) OR mother OR maternal OR placenta\* OR perinatal\* OR peri-natal\*).ab,ti.) AND (Bradycardia/ OR Drug-Related Side Effects and Adverse Reactions/ OR Fetal Growth Retardation/ OR Infant, Low Birth Weight/ OR Hypoglycemia/ OR Pregnancy Outcome/ OR Stillbirth/ OR Apgar Score/ OR Hemodynamics/ OR toxicity.xs. OR complication.xs. OR exp Birth Weight/ OR exp Infant, Premature/ OR (adverse\* OR bradycard\* OR effect\* OR ((intrauterin\* OR intra-uterin\*) ADJ3 growth) OR birth-weight\* OR birthweight\* OR (small ADJ2 (date OR gestation\*)) OR hypoglycemi\* OR hypoglycaemia OR ((pregnan\* OR deliver\* OR obstetr\* OR childbirth OR labour OR labor) ADJ3 outcome\*) OR stillbirth OR stillborn OR still-birth OR still-born OR Apgar OR harm\* OR toxic\* OR intoxic\* OR hemodynamic\* OR haemodynamic\* OR complication\* OR (prematur\* ADJ3 (birth)) OR prematurity).ab,ti.) AND (Infant, Newborn/ OR Infant, Low Birth Weight/ OR Stillbirth/ OR Apgar Score/ OR exp Birth Weight/ OR (newborn\* OR new-born\* OR neonat\* OR postnatal\* OR birth-weight\* OR birthweight\* OR (small ADJ2 (date OR gestation\*)) OR stillbirth OR stillborn OR still-birth OR still-born OR Apgar).ab,ti.) NOT (exp animals/ NOT humans/) AND english.la.

**Web of Science SCI-EXPANDED & SSCI**

TS((((beta\* OR  $\beta$  OR  $\beta$ 1 OR  $\beta$ 2 OR  $\beta$ 3) NEAR/2 (block\* OR antagonist\*)) OR adaprolol\* OR afurolool\* OR alprenolol\* OR befunolol\* OR bfe-55\* OR bopindolol\* OR bornaprolol\* OR bromoacetylalprenololmenthane\* OR bucindolol\* OR bucumolol\* OR bufetolol\* OR bufuralol\* OR bunitrolol\* OR bunolol\* OR bupranolol\* OR butofilolol\* OR carazolol\* OR carpindolol\* OR carteolol\* OR carvedilol\* OR cloranolol\* OR deacetylmepipranolol\* OR dexpropranolol\* OR diacetolol\* OR dichlorisoprenaline\* OR dihydroalprenolol\* OR dilevalol\* OR diprafenone\* OR ersentilide\* OR exaprolol\* OR falintolol\* OR flestolol\* OR hydroxybenzylpindolol\* OR indenolol\* OR iodopindolol\* OR iprocrolol\* OR isamoltane\* OR isoxaprolol\* OR labetalol\* OR levobunolol\* OR levomoprolol\* OR mepindolol\* OR mercuderamide\* OR metipranolol\* OR moprolol\* OR nadolol\* OR nifenalol\* OR oberadilol\* OR oxprenolol\* OR pafenolol\* OR pamatolol\* OR penbutolol\* OR pindolol\* OR primidolol\* OR prizidilol\* OR procinolol\* OR pronetalol\* OR propranolol\* OR proxodolol\* OR ridazolol\* OR soquinolol\* OR sotalol\* OR spirendolol\* OR tazolol\* OR tertatolol\* OR tienoxolol\* OR tilisolol\* OR timolol\* OR tolamolol\* OR toliprolol\* OR trasitensin\* OR trepress\* OR tribendilol\* OR viskaldix\* OR xibenolol\* OR zoleprodolol\* OR acebutolol\* OR alpha-hydroxymetoprolol\* OR atenolol\* OR bendacalol\* OR betaxolol\* OR bevantolol\* OR bisoprolol\* OR celiprolol\* OR cetamolol\* OR cyanoiodopindolol\* OR cyanopindolol\* OR dramedilol\* OR epanolol\* OR esmolol\* OR flusoxolol\* OR landiolol\* OR metoprolol\* OR nebivolol\* OR practolol\* OR ritodrine\* OR salcardolol\* OR sandoz-204545\* OR talinolol\* OR vortioxetine\* OR bendacalol\* OR butoxamine\* OR cicloprolol\* OR arotinolol\*)) AND ((pregnan\* OR prenatal\* OR (breast NEAR/1 (feed\* OR fed OR milk)) OR human-milk OR lactat\* OR intra-uterin\* OR intrauterin\* OR ((fetus\* OR foetus\* OR fetal\* OR foetal\*) NEAR/2 expos\*) OR mother OR maternal OR placenta\* OR perinatal\* OR peri-natal\*)) AND ((adverse\* OR bradycard\* OR effect\* OR ((intrauterin\* OR intra-uterin\*) NEAR/2 growth) OR birth-weight\* OR birthweight\* OR (small NEAR/2 (date OR gestation\*)) OR hypoglycemi\* OR hypoglycaemia OR ((pregnan\* OR deliver\* OR obstetr\* OR childbirth OR labour OR labor) NEAR/2 outcome\*) OR stillbirth OR stillborn OR still-birth OR still-born OR Apgar OR harm\* OR toxic\* OR intoxic\* OR hemodynamic\* OR haemodynamic\* OR complication\* OR (prematu\* NEAR/2 (birth)) OR prematurity)) AND ((newborn\* OR new-born\* OR neonat\* OR postnatal\* OR birth-weight\* OR birthweight\* OR (small NEAR/2 (date OR gestation\*)) OR stillbirth OR stillborn OR still-birth OR still-born OR Apgar))) AND DT=(article) AND LA=(english)

**Cochrane CENTRAL register of trials**

(((((beta\* OR  $\beta$  OR  $\beta$ 1 OR  $\beta$ 2 OR  $\beta$ 3) NEAR/3 (block\* OR antagonist\*)) OR adaprolol\* OR afurolol\* OR alprenolol\* OR befunolol\* OR bfe NEXT 55\* OR bopindolol\* OR bornaprolol\* OR bromoacetylalprenololmenthane\* OR bucindolol\* OR bucumolol\* OR bufetolol\* OR bufuralol\* OR bunitrolol\* OR bunolol\* OR bupranolol\* OR butofilolol\* OR carazolol\* OR carpindolol\* OR carteolol\* OR carvedilol\* OR cloranolol\* OR deacetylmepipranolol\* OR dexpropranolol\* OR diacetolol\* OR dichlorisoprenaline\* OR dihydroalprenolol\* OR dilevalol\* OR diprafenone\* OR ersentilide\* OR exaprolol\* OR falintolol\* OR flestolol\* OR hydroxybenzylpindolol\* OR indenolol\* OR iodopindolol\* OR iprocrolol\* OR isamoltane\* OR isoxaprolol\* OR labetalol\* OR levobunolol\* OR levomoprolol\* OR mepindolol\* OR mercuderamide\* OR metipranolol\* OR moprolol\* OR nadolol\* OR nifenalol\* OR oberadilol\* OR oxprenolol\* OR pafenolol\* OR pamatolol\* OR penbutolol\* OR pindolol\* OR primidolol\* OR prizidilol\* OR procinolol\* OR pronetalol\* OR propranolol\* OR proxodolol\* OR ridazolol\* OR soquinolol\* OR sotalol\* OR spirendolol\* OR tazolol\* OR tertatolol\* OR tienoxolol\* OR tilisolol\* OR timolol\* OR tolamolol\* OR toliprolol\* OR trasitensin\* OR trepress\* OR tribendilol\* OR viskaldix\* OR xibenolol\* OR zoleprodolol\* OR acebutolol\* OR alpha NEXT hydroxymetoprolol\* OR atenolol\* OR bendacalol\* OR betaxolol\* OR bevantolol\* OR bisoprolol\* OR celiprolol\* OR cetamolol\* OR cyanoiodopindolol\* OR cyanopindolol\* OR dramedilol\* OR epanolol\* OR esmolol\* OR flusoxolol\* OR landiolol\* OR metoprolol\* OR nebivolol\* OR practolol\* OR ritodrine\* OR salcardolol\* OR sandoz NEXT 204545\* OR talinolol\* OR vortioxetine\* OR bendacalol\* OR butoxamine\* OR cicloprolol\* OR arotinolol\*):Ab,ti) AND ((pregnan\* OR prenatal\* OR (breast NEXT/1 (feed\* OR fed OR milk)) OR human NEXT milk OR lactat\* OR intra NEXT uterin\* OR intrauterin\* OR ((fetus\* OR foetus\* OR fetal\* OR foetal\*) NEAR/3 expos\*) OR mother OR maternal OR placenta\* OR perinatal\* OR peri NEXT natal\*):Ab,ti) AND ((adverse\* OR bradycard\* OR effect\* OR ((intrauterin\* OR intra NEXT uterin\*) NEAR/3 growth) OR birth NEXT weight\* OR birthweight\* OR (small NEXT/2 (date OR gestation\*)) OR hypoglycemi\* OR hypoglycaemia OR ((pregnan\* OR deliver\* OR obstetr\* OR childbirth OR labour OR labor) NEAR/3 outcome\*) OR stillbirth OR stillborn OR still NEXT birth OR still NEXT born OR Apgar OR harm\* OR toxic\* OR intoxic\* OR hemodynamic\* OR haemodynamic\* OR complication\* OR (prematur\* NEAR/3 (birth)) OR prematurity):ab,ti) AND ((newborn\* OR new NEXT born\* OR neonat\* OR postnatal\* OR birth NEXT weight\* OR birthweight\* OR (small NEXT/2 (date OR gestation\*)) OR stillbirth OR stillborn OR still NEXT birth OR still NEXT born OR Apgar):ab,ti)
